# Supplementary material for: Separation and Recycling of Concentrated Heavy Metal Wastewater by Tube Membrane Distillation Integrated with Crystallization
Source: PubMed Central journal article supplement (PMC7022982; doi:10.3390/membranes10010019), 2020-01-20
Supplement: membranes-10-00019-s001.pdf [file membranes-10-00019-s001.pdf]

# Supplementary Materials: Separation and Recycling of Concentrated Heavy Metal Wastewater by Tube Membrane Distillation Integrated with Crystallization

Xiang-Yang Lou <sup>1,2,3</sup>, Zheng Xu <sup>1,4</sup>, An-Ping Bai <sup>5</sup>, Montserrat Resina-Gallego <sup>2</sup> and Zhong-Guang Ji <sup>1,4,\*</sup>

<sup>1</sup> National Engineering Lab. of Biohydrometallurgy, GRINM Technology Group Co., Ltd., Beijing 101407, China; Xiangyang.Lou@uab.cat (X.-Y.L.); xzh63@126.com (Z.X.)

<sup>2</sup> GTS Research Group, Department of Chemistry, Faculty of Science, Universitat Autònoma de Barcelona, Bellaterra 08290, Spain; montserrat.resina@uab.cat

<sup>3</sup> General Research Institute for Nonferrous Metals, Beijing 100088, China

<sup>4</sup> GRINM Resources and Environmental Tech. Co., Ltd., Beijing 101407, China

<sup>5</sup> Beijing Vocational College of Labor and Social Security, Beijing 102200, China; baianning1992@163.com

\* Correspondence: jizhongguang@grinm.com; Tel.: +86-010-8224-1783

**Table 1.** Correspondence of saturation with the mass fraction of ZnSO<sub>4</sub> solution at 65 °C.

| Saturation | Mass Fraction/% |
|------------|-----------------|
| 0.34       | 20              |
| 1.0        | 42.64           |
| 1.1        | 44.98           |
| 1.2        | 47.14           |
| 1.3        | 49.14           |
| 1.38       | 50.63           |
| 1.4        | 51.00           |
| 1.5        | 52.72           |
| 1.6        | 54.32           |
| 1.7        | 55.82           |
| 1.8        | 57.23           |
| 1.9        | 58.55           |

**Table 2.** Correspondence of saturation with the mass fraction of NiSO<sub>4</sub> solution at 65 °C.

| Saturation | Mass Fraction/% |
|------------|-----------------|
| 0.43       | 20              |
| 1.0        | 36.64           |
| 1.1        | 38.88           |
| 1.2        | 40.97           |
| 1.3        | 42.92           |
| 1.38       | 44.39           |
| 1.4        | 44.74           |
| 1.5        | 46.45           |
| 1.6        | 48.06           |
| 1.7        | 49.57           |
| 1.8        | 51.00           |
| 1.9        | 52.35           |

### 1. Possibility Discussions of Carbonate and Hydroxide Salts during the Experiments

For hydroxide:  $pK [Zn(OH)_2] = 3.3 \times 10^{-13}$ ;  $pK [Ni(OH)_2] = 3.0 \times 10^{-16}$ . In our experiments, the pH values are 4–5. So, the concentration of H<sup>+</sup> is higher than  $10^{-5}$  M and lower than  $10^{-4}$  M. The concentration of OH<sup>-</sup> is lower than  $10^{-9}$  M.

In order to form the crystal of Zn(OH)<sub>2</sub>, the concentration of Zn<sup>2+</sup> should be higher than  $3.3 \times 10^5$  M ( $2.16 \times 10^7$  g·L<sup>-1</sup>). For the crystal of Ni(OH)<sub>2</sub>, the concentration of Ni<sup>2+</sup> should be higher than  $3.0 \times 10^2$  M ( $1.76 \times 10^4$  g·L<sup>-1</sup>). So, it is impossible to form the hydroxide precipitations in the experiments.

For carbonate:  $pK [ZnCO_3] = 1.7 \times 10^{-11}$ ;  $pK [NiCO_3] = 1.3 \times 10^{-7}$ .

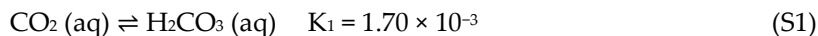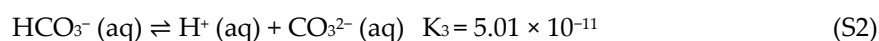

So,

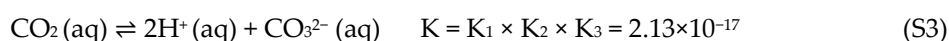

The current, average concentration of CO<sub>2</sub> is 387 ppm, thus  $1.32 \times 10^{-5}$  M; the concentration of H<sup>+</sup> is above  $10^{-5}$  M. So, the concentration of CO<sub>3</sub><sup>2-</sup> is below  $1.61 \times 10^{-15}$  M.

In order to form the crystal of ZnCO<sub>3</sub>, the concentration of Zn<sup>2+</sup> should be higher than  $1.06 \times 10^3$  M ( $6.93 \times 10^4$  g·L<sup>-1</sup>). For the crystal of NiCO<sub>3</sub>, the concentration of Ni<sup>2+</sup> should be higher than  $8.07 \times 10^7$  M ( $4.74 \times 10^9$  g·L<sup>-1</sup>).

So, it is impossible to form carbonate precipitations in the experiments.

### Reference:

1. Fengcheng, S. *Basic environmental engineering chemical experiment, 2nd ed.*; Wunan Publishing: Taiwan, China, 2017; pp. 91–93.
2. Carbon Dioxide as an Acid. Available online: <http://butane.chem.uiuc.edu/pshapley/GenChem1/L25/1.html> (accessed on 13 01 2020).

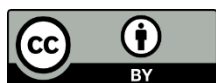

© 2020 by the authors. Submitted for possible open access publication under the terms and conditions of the Creative Commons Attribution (CC BY) license (<http://creativecommons.org/licenses/by/4.0/>).
